# Supplementary material
Source: PubMed Central journal article supplement (PMC5911935)
Supplement: NIHMS950535-supplement-2.pdf [file NIHMS950535-supplement-2.pdf]

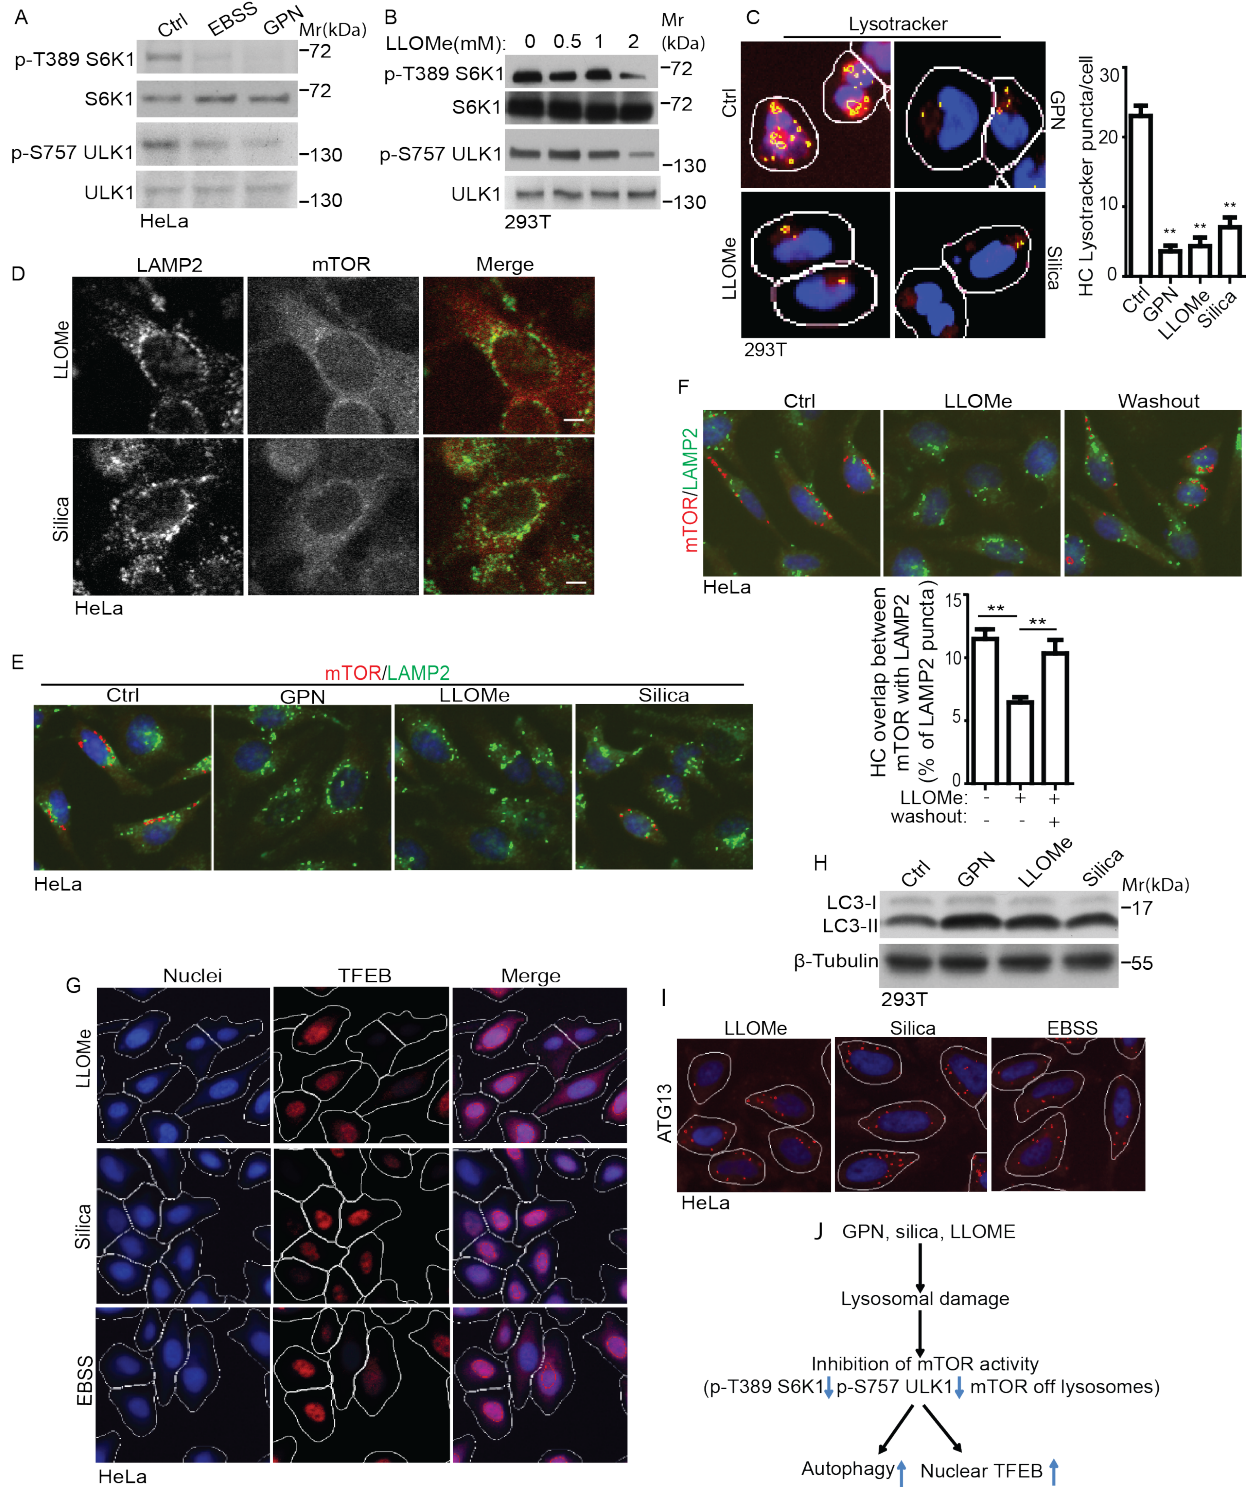

**Figure S1, related to Figure 1. Lysosomal damage inhibits mTOR signaling.** (A) Analysis of mTOR activity in HeLa cells treated with 100  $\mu$ M glycy-L-phenylalanine 2-naphththylamide (GPN) in full medium or starved in EBSS for 1 h. mTOR activity was monitored by immunoblotting analysis of S6K1 (p-T389) and ULK1 (p-S757) phosphorylation (phosphorylated S6K (T389) and ULK1 (S757) relative to total S6K and

ULK1, respectively). Control (Ctrl), untreated cells. **(B)** Dose-response analysis of mTOR activity in HEK293T cells treated with Leu-Leu-OMe (LLOMe) as indicated in full medium for 1 h. mTOR activity was monitored by immunoblotting as in A. **(C)** HEK293T cells were treated with lysosomal damaging agents (100  $\mu$ M GPN; 2mM LLOMe; 400  $\mu$ g/mL Silica) for 1 h in full medium and status of acidified organelles assessed by quantifying LysoTracker Red DND-99 puncta using automated high-content imaging and analysis (HC). None-treated cells were as control (Ctrl). White masks, algorithm defined cell boundaries (primary objects); yellow masks, computer-identified LysoTracker Red puncta (target objects). Data, means  $\pm$  SEM,  $n \geq 3$  independent experiments (500 primary objects counted per well;  $\geq 5$  wells/sample per each experiment), \*\* $p < 0.01$ , ANOVA. **(D)** Immunofluorescence confocal microscopy visualization of mTOR localization relative to LAMP2-positive lysosomes. HeLa cells were treated with 2mM LLOMe or 400  $\mu$ g/mL Silica in full medium for 1 h, followed by immunostaining of endogenous LAMP2 (green fluorescence, Alexa-488) and mTOR (red fluorescence, Alexa-568). Scale bar, 5  $\mu$ m. **(E)** Sample images from quantification scans using HC analysis of overlaps between mTOR and LAMP2 (corresponding data in Figure 1E) in HeLa cells treated with lysosomal damaging agents for 1 h in full medium. Red and green masks, computer-identified mTOR and LAMP2, respectively (target objects). Control (Ctrl), untreated cells. **(F)** HC analysis of overlaps between mTOR and LAMP2 in HeLa cells treated with 2 mM LLOMe for 1 h followed by 1 h washout (recovery phase) in full medium. Representative images: red and green masks, computer algorithm-identified mTOR and LAMP2 profiles, respectively (target objects). Ctrl, control untreated cells. Data, means  $\pm$  SEM,  $n \geq 3$  independent experiments (500 primary objects counted per well;  $\geq 5$  wells/sample per each experiment), \*\* $p < 0.01$ , ANOVA. **(G)** Representative HC images: TFEB nuclear translocation in HeLa cells treated with 2mM LLOMe or 400  $\mu$ g/mL Silica in full medium, or starved in EBSS for 1 h. Quantitative data are in Figure 1G. Blue: nuclei, Hoechst 33342; Red: anti-TFEB antibody, Alexa-568. White masks, algorithm-defined cell boundaries (primary objects); pink masks, computer-identified nuclear TFEB based on the average intensity of Alexa-568 fluorescence. **(H)** LC3-II levels in HEK293T cells treated with lysosomal damaging agents (100  $\mu$ M GPN; 2mM LLOMe; 400  $\mu$ g/mL Silica) in full medium for 1 h. Ctrl, control untreated cells. **(I)** Examples of HC images: ATG13 puncta in HeLa cells treated as indicated in full medium for 1 h (quantitative HC data, in Figure 1I). White masks, automatically defined cell boundaries (primary objects); red masks, computer-identified ATG13 puncta (target objects). **(J)** Schematic summary of the findings in Figures 1 and S1.

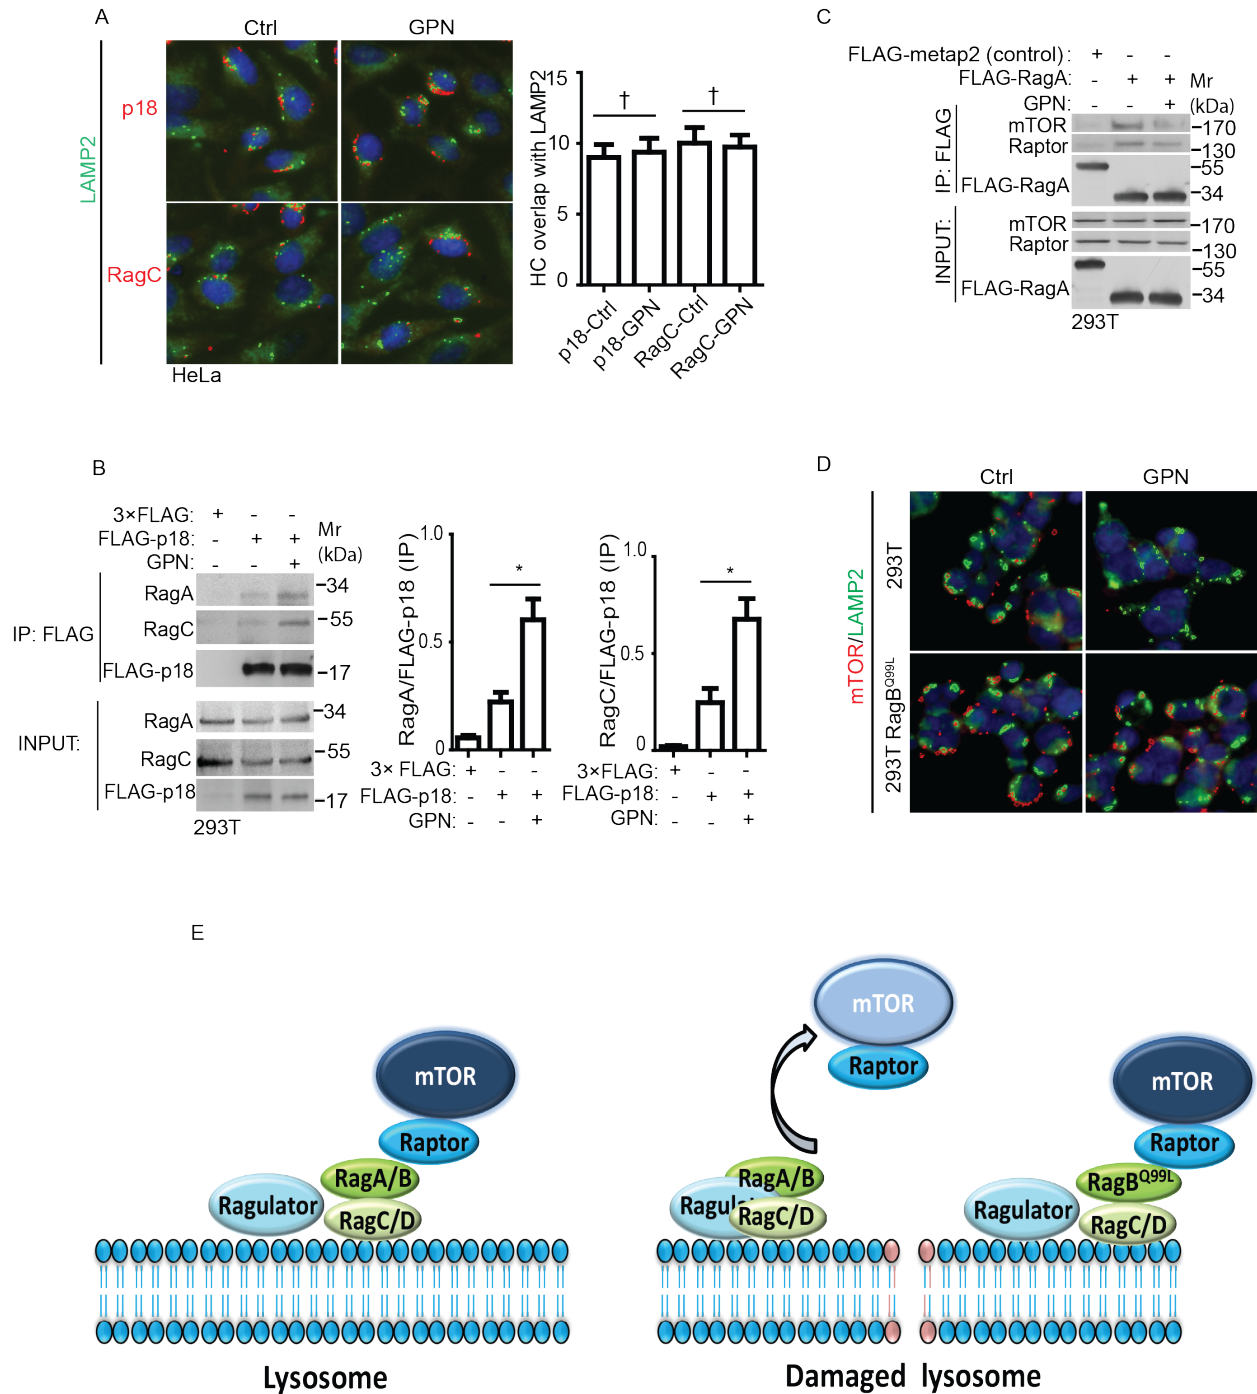

**Figure S2, related to Figure 2. Ragulator-Rag complex and mTOR signaling in response to lysosomal damage**

**(A)** HC analysis of overlaps between p18 or RagC and LAMP2 in HeLa cells treated with 100  $\mu$ M GPN in full medium for 1 h. Representative images shown in left panels. Red and green masks, computer-identified p18 or RagC and LAMP2, respectively (target objects). Ctrl (control): untreated cells. Data, means  $\pm$  SEM,  $n \geq 3$  independent experiments (500 primary objects counted per well;  $\geq 5$  wells/sample per each experiment),  $\dagger p \geq 0.05$ , ANOVA. **(B)** HEK293T cells expressing FLAG vector or FLAG-

p18 were treated with 100  $\mu$ M GPN in full medium for 1 h, and cell lysates were subjected to immunoprecipitation with anti-FLAG antibody, followed by immunoblotting analysis of endogenous RagA and RagC. Data, intensity ratio (intensity of RagA or RagC bands normalized to intensity of FLAG-p18 bands in immunoprecipitated material). Data, means  $\pm$  SEM, n = 3, \*p < 0.05, ANOVA. **(C)** Representative images corresponding to quantification by HC in Figure 2F of overlaps between mTOR and LAMP2 in HEK293T cells and HEK293T cells stably expressing constitutively active RagB GTPase (RagB<sup>Q99L</sup>) treated with 100  $\mu$ M GPN in full medium for 1 h. Red and green masks, computer-identified mTOR and LAMP2, respectively (target objects). **(D)** Immunoprecipitation analysis of interactions between RagA and mTOR/Raptor in cells treated with GPN. HEK293T cells overexpressing FLAG-metap2 (control) or FLAG-RagA were treated with 100  $\mu$ M GPN in full medium for 1 h. Cell lysates were immunoprecipitated with anti-FLAG antibody and immunoblotted for endogenous mTOR or Raptor. **(E)** Pictorial summary of the results shown in Figures 2 and S2.

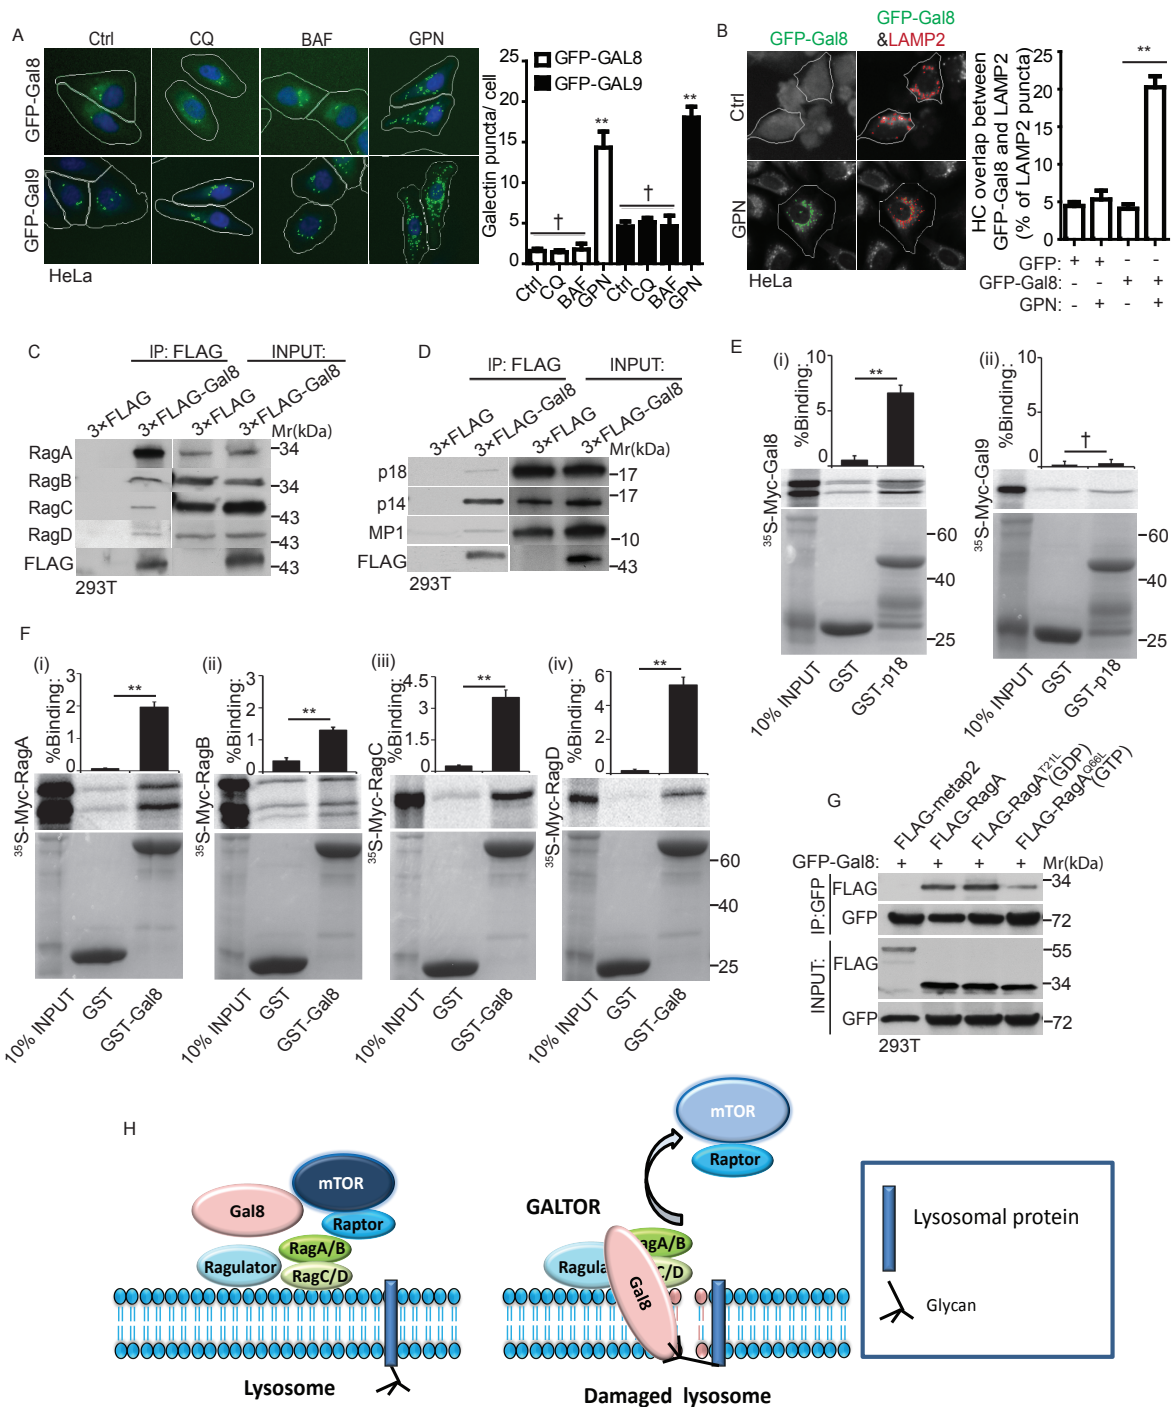

**Figure S3, related to Figure 3. Gal8 is in dynamic complexes with the mTOR machinery**

**(A)** HC analysis of the puncta of galectins in response to chloroquine, Bafilomycin A1 and GPN. HeLa cells overexpressing GFP-Gal8 or GFP-Gal9 were treated with 100  $\mu$ M chloroquine (CQ), 100  $\mu$ M Bafilomycin A1 (BAF) or 100  $\mu$ M GPN in full medium for 1 h, and the puncta of GFP-Gal8 or GFP-Gal9 were quantified by HC. White masks, automatically defined cell boundaries (primary objects); green masks, computer-identified GFP-Gal8 or GFP-Gal9 (target objects). Ctrl (control): untreated cells. Data, means  $\pm$  SEM,  $n \geq 3$  independent experiments (500 primary objects counted per well;  $\geq 5$  wells/sample per each experiment),  $\dagger p \geq 0.05$ ,  $**p < 0.01$ , ANOVA. **(B)** HC analysis of the overlaps between Gal8 and LAMP2 in response to GPN. HeLa cells expressing GFP-Gal8 were treated with 100  $\mu$ M GPN in full medium for 1 h, and the overlap between GFP-Gal8 and LAMP2 were quantified by HC. White masks, computer algorithm-defined cell boundaries (primary objects); red and green masks, computer-identified LAMP2 and GFP-Gal8 puncta (target objects). Ctrl (control): untreated cells. Data, means  $\pm$  SEM,  $n \geq 3$  independent experiments (500 primary objects counted per well;  $\geq 5$  wells/sample per each experiment),  $**p < 0.01$ , ANOVA. **(C)** Immunoprecipitation analysis of the interactions between Gal8 and GTPases. HEK293T cells overexpressing FLAG-tagged Gal8 were immunoprecipitated with anti-FLAG beads. Cell lysates and precipitates were blotted for endogenous RagA, B, C, and D. **(D)** Immunoprecipitation analysis of interactions between Gal8 and Ragulator components p14, p18 and MP1. HEK293T cells overexpressing FLAG-tagged Gal8 were immunoprecipitated/collected with anti-FLAG (beads). Cell lysates and collected immune complexes were blotted for endogenous p18, p14, and MP1. **(E)(i-ii)** GST pulldown assay with in vitro translated Myc-tagged Gal8 or Gal9 and GST-tagged p18. GST-tagged p18 immobilized on Gluthatione sepharose beads were incubated with in vitro translated Myc-tagged Gal8 or Gal9 radiolabeled with  $^{35}$ S-methionine. Interactions were assessed by autoradiography. Data (% binding), means  $\pm$  SEM,  $n = 3$ ,  $\dagger p \geq 0.05$ ,  $**p < 0.01$ , ANOVA. **(F)(i-iv)** GST pulldown assay with in vitro translated Myc-tagged Rag proteins and GST-tagged Gal8. GST-tagged Gal8 immobilized on Gluthatione sepharose beads were incubated with in vitro translated Myc-tagged Rag proteins radiolabeled with  $^{35}$ S-methionine. Interactions were assessed by autoradiography. Data, Data (% binding), means  $\pm$  SEM,  $n = 3$ ,  $**p < 0.01$ , ANOVA. **(G)** Immunoprecipitation analysis of the interactions between Gal8 and RagA GTPase and its mutants. Lysates of HEK293T cells overexpressing GFP-Gal8 and FLAG-tagged metap2 or RagA proteins (RagA<sup>WT</sup>, RagA<sup>T21L</sup> or RagA<sup>Q66L</sup>) were subjected to anti-GFP immunoprecipitation, followed by immunoblotting for FLAG-tagged RagA proteins. **(H)** Schematic summary of results in Figures 3 and S3, and a model depicting predicted GALTOR complex states based on experimental observations: left, intact lysosome with Gal8 in active (darker shade of blue) mTOR-containing complexes on the cytofacial side of the lysosome limiting membrane; right, upon lysosomal membrane damage, Gal8 gains access to exofacially (lumenally) facing glycoconjugates (represented by a trident), with increased Ragulator-Rags interactions whereas inactive (lighter shade of blue) mTOR-raptor complex dissociates from the lysosome.

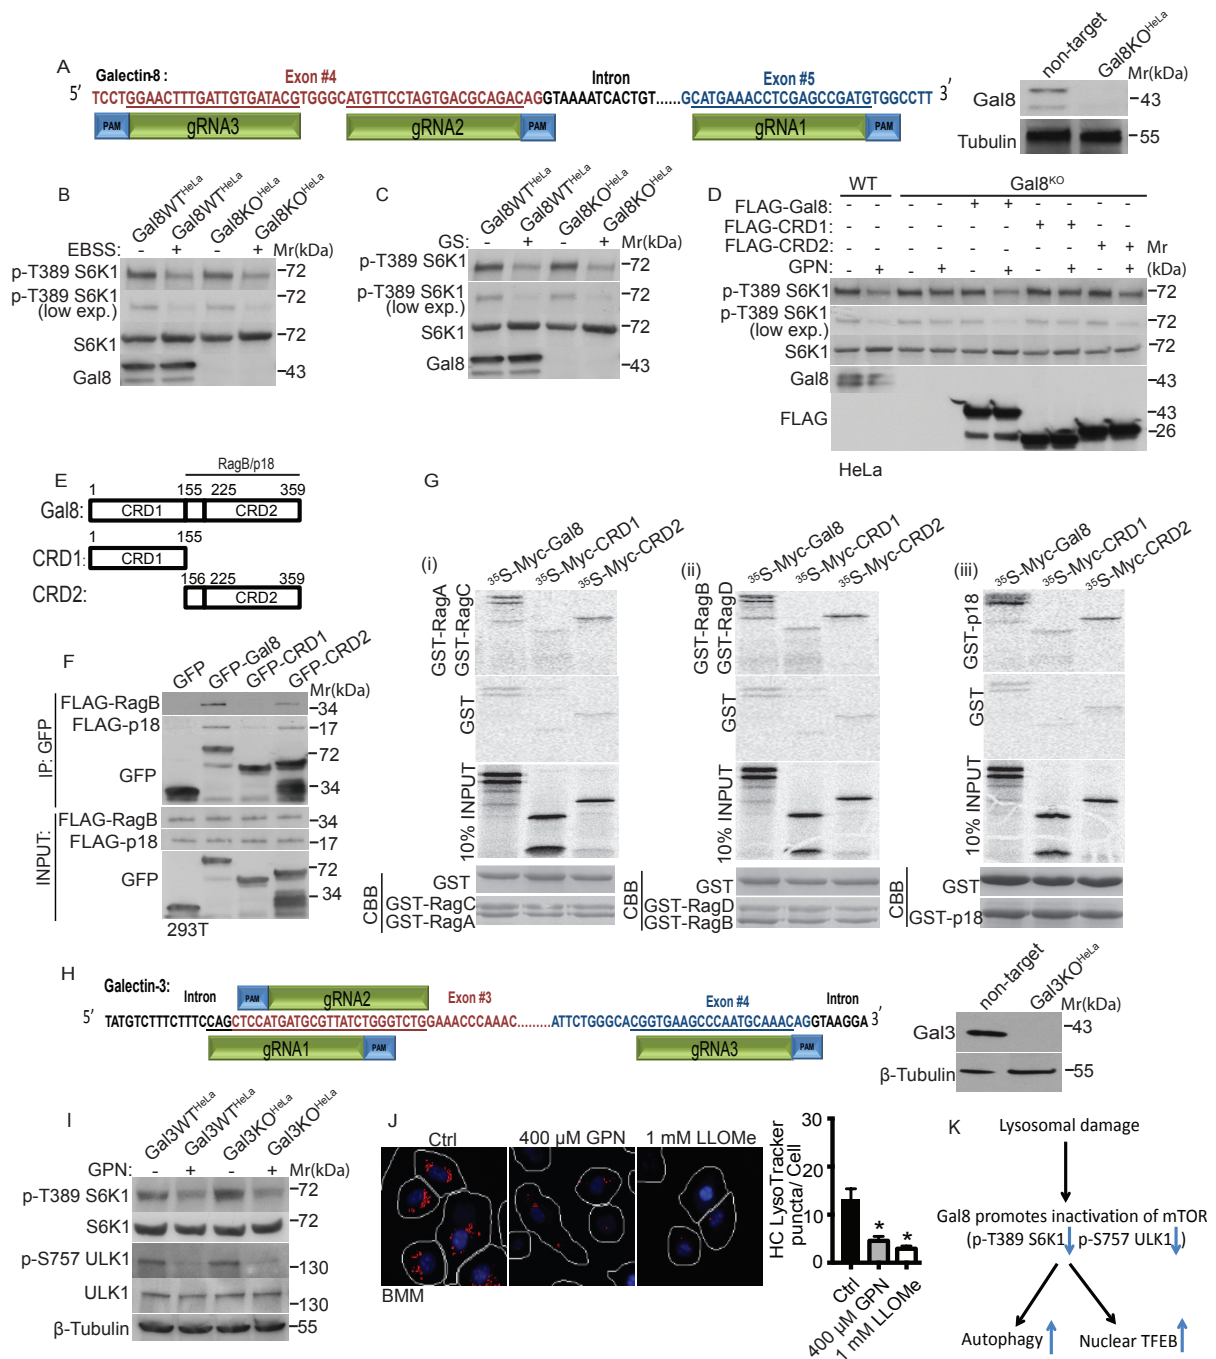

**Figure S4, related to Figure 4. Gal8 and Gal3 CRISPR knockouts and response to lysosomal damage.**

**(A)** Schematic for CRISPR/Cas9-mediated knockout strategy of *LGALS8*, and validation of Gal8-knockout (Gal8<sup>WT</sup><sup>HeLa</sup>) by immunoblotting in HeLa cells. **(B)** Immunoprecipitation analysis of mTOR activity in parental HeLa (Gal8<sup>WT</sup><sup>HeLa</sup>) and Gal8-knockout (Gal8<sup>KO</sup><sup>HeLa</sup>) HeLa cells upon EBSS treatment and glucose starvation (GS) **(C)** for 1 h. mTOR activity was monitored by immunoblotting analysis of S6K1

(T389) phosphorylation (phosphorylated S6K (T389) relative to total S6K). **(D)** Immunoprecipitation analysis of mTOR activity in wildtype (WT) and the complementation of Gal8 in Gal8-knockout (Gal8<sup>KO</sup>) HeLa cells upon GPN treatment. Gal8<sup>KO</sup> HeLa cells overexpressing FLAG-tagged full-length or truncated Gal8 were treated with 100  $\mu$ M GPN for 1 h in full medium. mTOR activity was monitored by immunoblotting analysis of S6K1 (T389) phosphorylation (phosphorylated S6K (T389) relative to total S6K). **(E)** Schematic diagram of Gal8 domains and deletion constructs. **(F)** HEK293T cells overexpressing GFP-tagged full-length or truncated Gal8 and FLAG-RagB or FLAG-p18 were subjected to anti-GFP immunoprecipitation, followed by immunoblotting for FLAG-RagB or FLAG-p18. **(G)(i)** GST pulldown assay with in vitro translated Myc-tagged Gal8 wildtype or mutants and GST-tagged RagA and RagC. GST-tagged RagA and RagC immobilized on Gluthatione sepharose beads were incubated with in vitro translated Myc-tagged Gal8 wildtype or mutants radiolabeled with <sup>35</sup>S-methionine. Interactions were detected by autoradiography. **(ii)** GST pulldown assay with in vitro translated Myc-tagged Gal8 wildtype or mutants and GST-tagged RagB and RagD. GST-tagged RagB and RagD immobilized on Gluthatione sepharose beads were incubated with in vitro translated Myc-tagged Gal8 wildtype or mutants radiolabeled with <sup>35</sup>S-methionine. Interactions were detected by autoradiography. **(iii)** GST pulldown assay with in vitro translated Myc-tagged Gal8 wildtype or mutants and GST-tagged LAMTOR1/p18. GST-tagged p18 immobilized on Gluthatione sepharose beads were incubated with in vitro translated Myc-tagged Gal8 wildtype or mutants radiolabeled with <sup>35</sup>S-methionine. Interactions were detected by autoradiography. CBB: Coomassie brilliant blue staining. **(H)** Schematic for CRISPR/Cas9-mediated knockout strategy of *LGALS3*, and validation of Gal3-knockout (Gal3WT<sup>HeLa</sup>) by immunoblotting in HeLa cells. **(I)** Analysis of mTOR activity in parental HeLa (Gal3WT<sup>HeLa</sup>) and Gal3-knockout (Gal3KO<sup>HeLa</sup>) HeLa cells treated with 100  $\mu$ M GPN in full medium for 1 h. mTOR activity was monitored by immunoblotting analysis of S6K1 (T389) and ULK1 (S757) phosphorylation (phosphorylated S6K (T389) and ULK1 (S757) relative to total S6K and ULK1, respectively). **(J)** Primary bone marrow-derived macrophages (BMMs) cells were treated with lysosomal damaging agents for 1 h in full medium and status of acidified organelles assessed by quantifying LysoTracker Red DND-99 puncta using HC. White masks, algorithm-defined cell boundaries (primary objects); red masks, computer-identified LysoTracker Red puncta (target objects). Ctrl (control): untreated cells. Data, means  $\pm$  SEM,  $n \geq 3$  independent experiments (500 primary objects counted per well;  $\geq 5$  wells/sample per each experiment), \* $p < 0.05$ , ANOVA. **(K)** Schematic summary of the results shown in Figures 4 and S4.



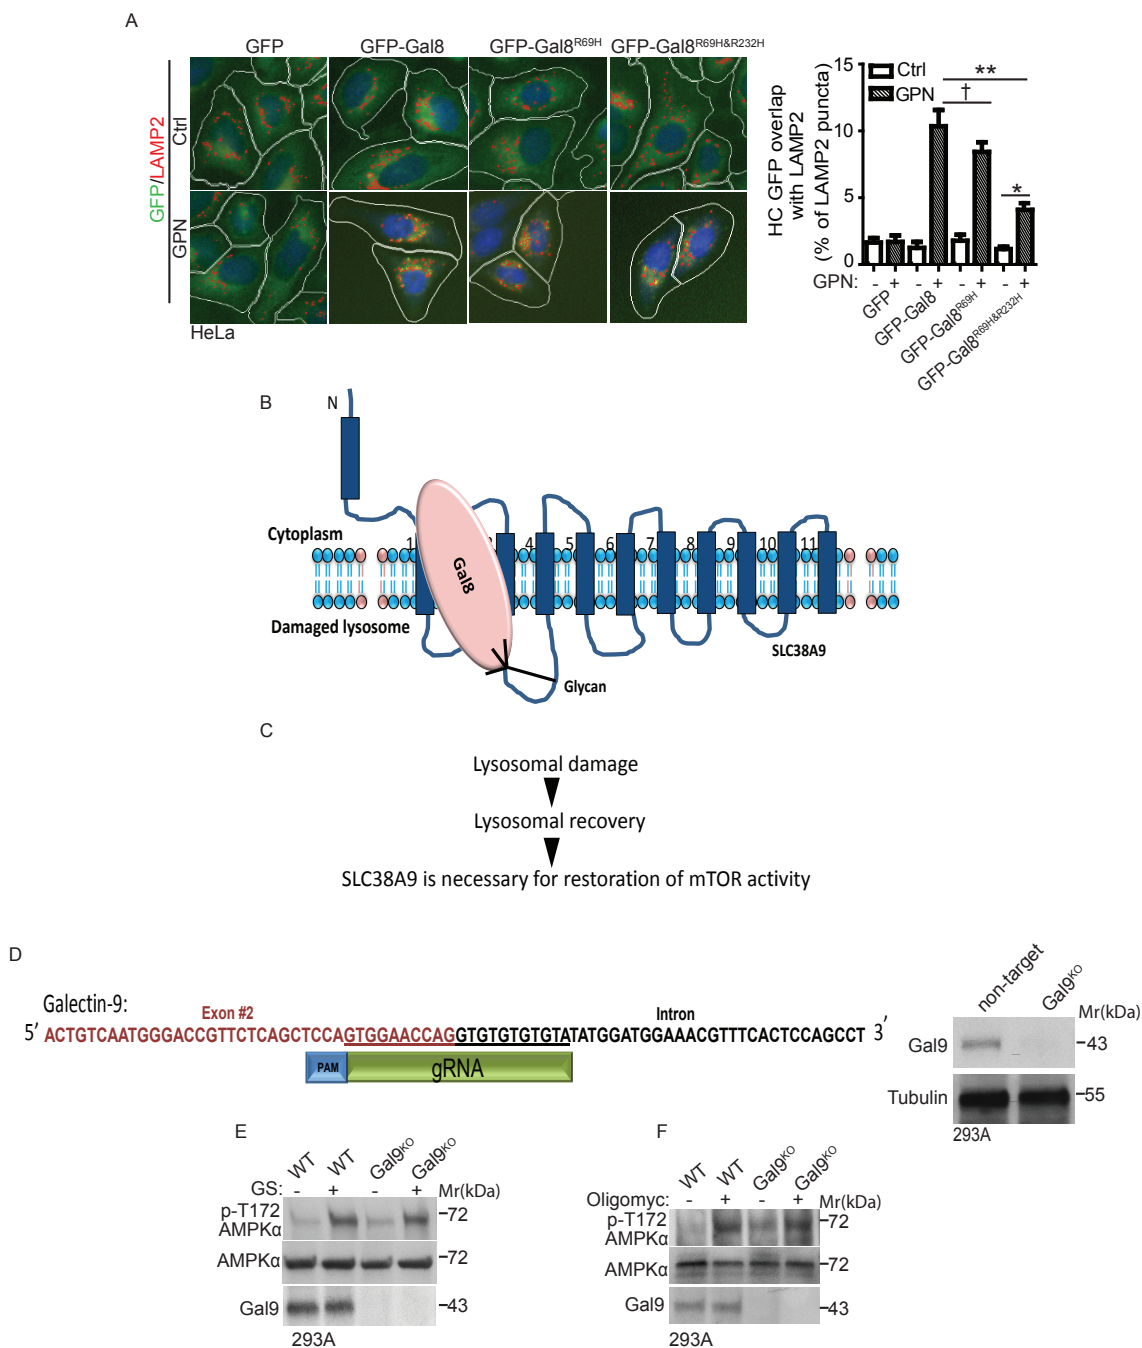

**Figure S5, related to Figures 5, 6 and 7. Interactions between Gal8 and SLC38A9 and Gal9 CRISPR knockout effects on AMPK.**

**(A)** Quantification by HC of overlaps between GFP tagged galectin8 (wild type and glycan recognition-mutant forms) and LAMP2 in HeLa cells expressing corresponding plasmids treated with 100  $\mu$ M GPN for 1 h in full medium. White masks, automatically defined cell boundaries (primary objects); Red and green masks, computer-identified LAMP2 and GFP tagged proteins, respectively (target objects). None-treated cells were as control (Ctrl). Data, means  $\pm$  SEM,  $n \geq 3$  independent experiments (500 primary

objects counted per well;  $\geq 5$  wells/sample per each experiment),  $\dagger p \geq 0.05$ ,  $*p < 0.05$ ,  $**p < 0.01$ , ANOVA. **(B)** Schematic summary of the results shown in Figure 5. **(C)** Schematic summary of the results shown in Figure 6. **(D)** Schematic diagram for CRISPR/Cas9-mediated knockout of *LGALS9* in HEK293A cells. Gal9-knockout (Gal9<sup>KO</sup>) was validated by Western blotting. **(E)** Analysis of the activation of AMPK in wildtype (WT) and Gal9-knockout (Gal9<sup>KO</sup>) HEK293A cells upon glucose starvation (GS) or 1 $\mu$ M oligomycin treatment **(F)** for 1 h. AMPK activity was monitored by immunoblotting analysis of AMPK $\alpha$  (T172) phosphorylation (phosphorylated AMPK $\alpha$  (T172) relative to total AMPK $\alpha$ ).

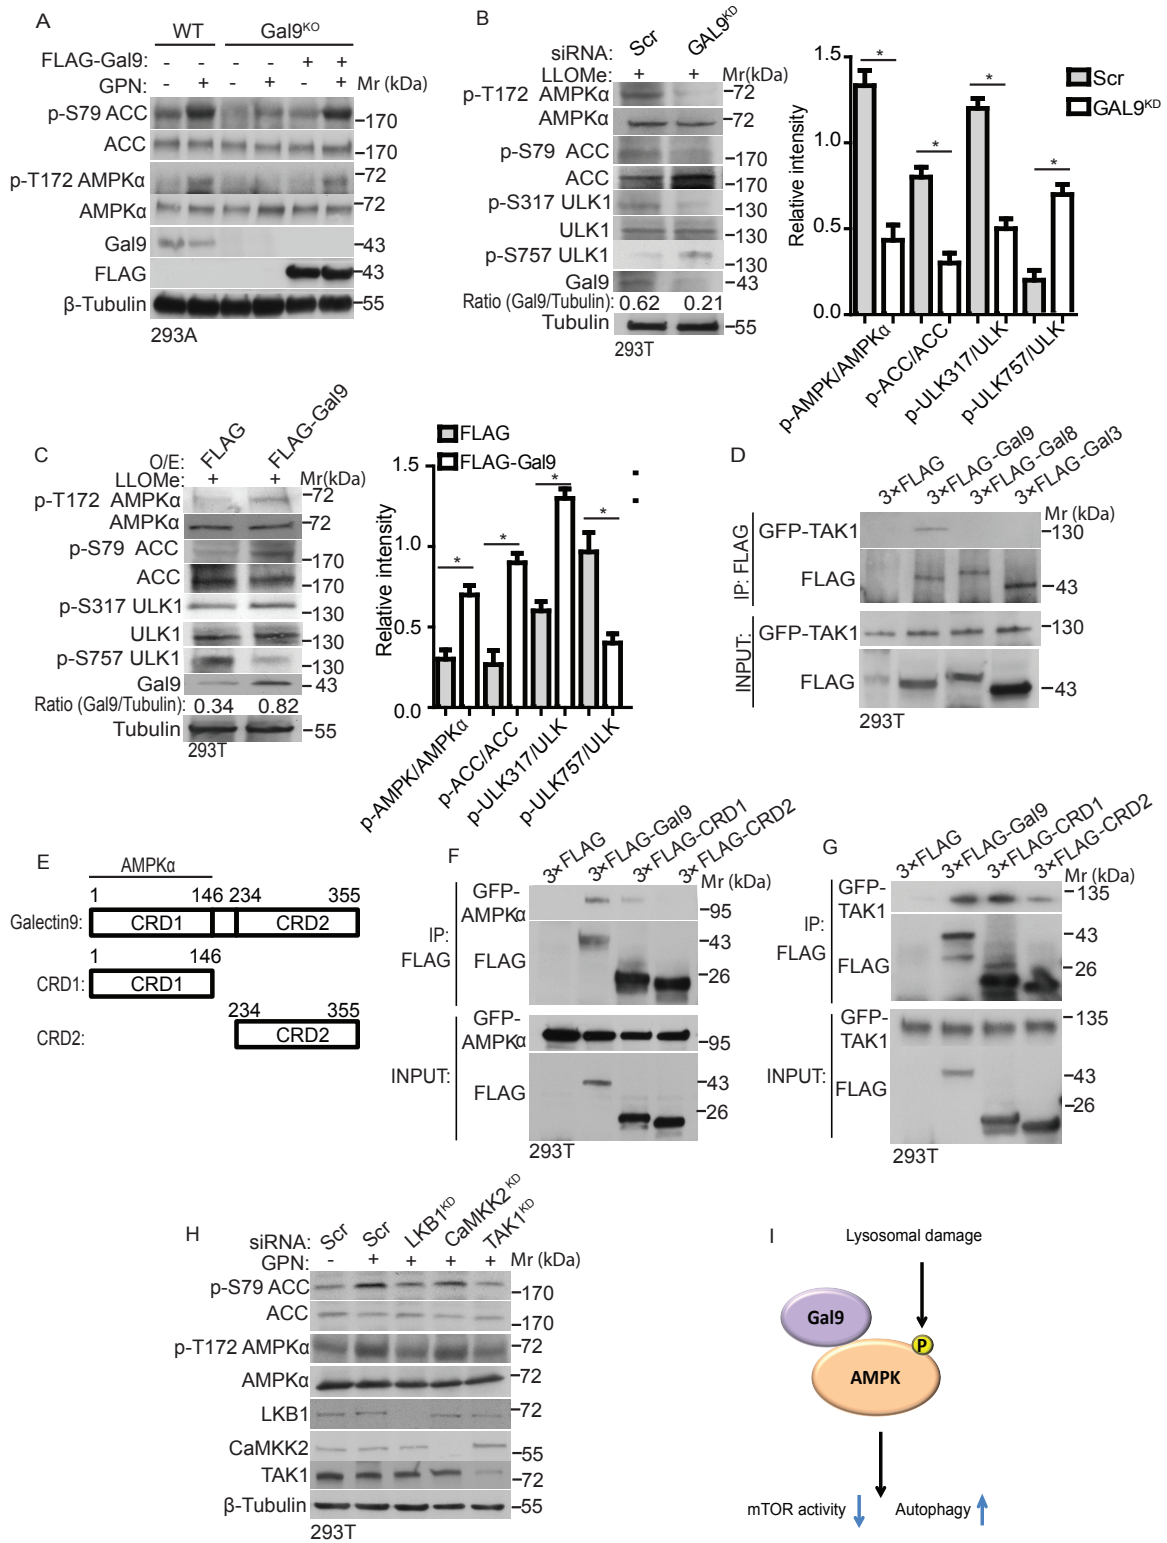

**Figure S6, related to Fig. 7. Analysis of Gal9's role in activation of AMPK in response to lysosomal damage**

**(A)** Analysis of the activation of AMPK in wildtype (WT) and the complementation of Gal9 in Gal9-knockout (Gal9<sup>KO</sup>) HEK293A cells treated with 100  $\mu$ M GPN in full medium for 1 h. AMPK activity was monitored by immunoblotting analysis of AMPK $\alpha$  (T172) and acetyl-CoA carboxylase (ACC, S79) phosphorylation (phosphorylated AMPK $\alpha$  (T172) and ACC (S79) relative to total AMPK $\alpha$  and ACC respectively). **(B)** HEK293T cells transfected with scrambled siRNA (Scr) or Gal9 siRNA (Gal9<sup>KD</sup>) were treated with 2 mM LLOMe in full medium for 1 h, and the cell lysates were analyzed for phosphorylation of indicated proteins. Data, means  $\pm$  SEM, n = 3, \*p < 0.05, ANOVA. **(C)** HEK293T cells overexpressing FLAG-Gal9 were treated with 2 mM LLOMe in full medium for 1 h. Cell lysates were analyzed for the indicated proteins. Data, means  $\pm$  SEM, n = 3, \*p < 0.05, ANOVA. **(D)** Immunoprecipitation analysis of the interactions between galectins and TAK1. HEK293T cells overexpressing FLAG-tagged galectins and GFP-tagged TAK1 were subjected to anti-FLAG immunoprecipitation followed by immunoblotting for GFP-tagged TAK1. **(E)** Schematic diagram of Gal9 domains and deletion constructs. **(F)** HEK293T cells overexpressing FLAG-tagged full-length or truncated Gal9 and GFP-AMPK were subjected to anti-FLAG immunoprecipitation, followed by immunoblotting for GFP-AMPK. **(G)** HEK293T cells overexpressing FLAG-tagged full-length or truncated Gal9 and GFP-TAK1 were subjected to anti-FLAG immunoprecipitation, followed by immunoblotting for GFP-TAK1. **(H)** Analysis of the activation of AMPK in HEK293T cells subjected to knockdowns as indicated treated with 100  $\mu$ M GPN in full medium for 1 h. AMPK activity was monitored by immunoblotting analysis of AMPK $\alpha$  (T172) and acetyl-CoA carboxylase (ACC, S79) phosphorylation (phosphorylated AMPK $\alpha$  (T172) and ACC (S79) relative to total AMPK $\alpha$  and ACC respectively). Cells transfected with scrambled siRNA were as control (Scr). **(I)** Schematic summary of the results is shown in Figure 7A, B.
